# Supplementary material
Source: Royal Society of Chemistry journal article supplement (doi:10.1039/d5tc04228c)
Supplement: d5tc04228c1.pdf [file d5tc04228c1.pdf]

## SUPPLEMENTARY MATERIAL

### The Lateral Photovoltaic Effect of WSeS/Si Heterojunction

Miaoran Kang<sup>1</sup>, Pengbo Zhang<sup>1</sup>, Jiarui Guo,<sup>1</sup> Lingli Zhang,<sup>1\*</sup> Lingling Tao,<sup>1</sup> Qiang Fu,<sup>1</sup> and Xianjie Wang,<sup>1,2,3 \*</sup>

<sup>1</sup> School of Physics, Harbin Institute of Technology, Harbin 150001, China

<sup>2</sup> Frontiers Science Center for Matter Behave in Space Environment, Harbin Institute of Technology, Harbin 150001, China

<sup>3</sup> Zhengzhou Research Institute, Harbin Institute of Technology, Zhengzhou 450046, China

\*Email Correspondence: zhanglingli@hit.edu.cn and wangxianjie@hit.edu.cn

**Keywords:** lateral photovoltaic effect; position-sensitive detectors; heterojunction; WSeS

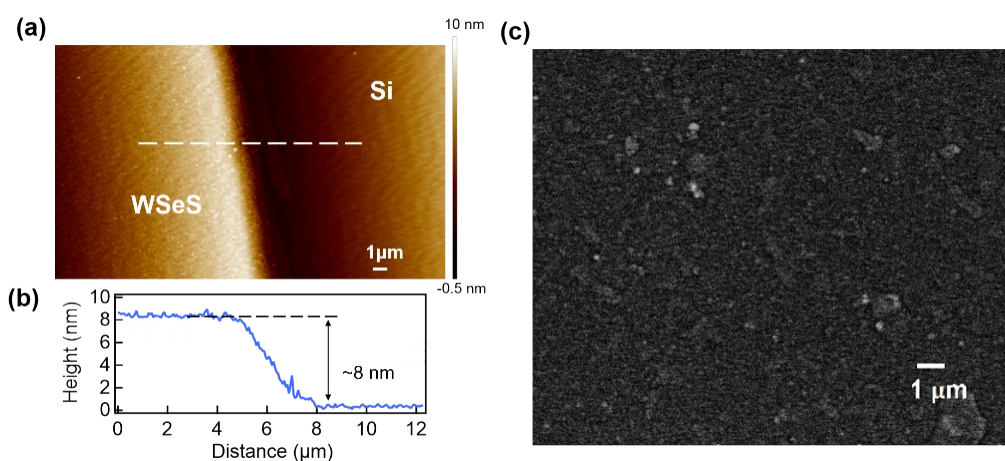

Figure S1. (a) AFM image of the WSeS/Si heterojunction (b) Corresponding Height profiles along the lines drawn in (a). (c) SEM image of the thin film surface.

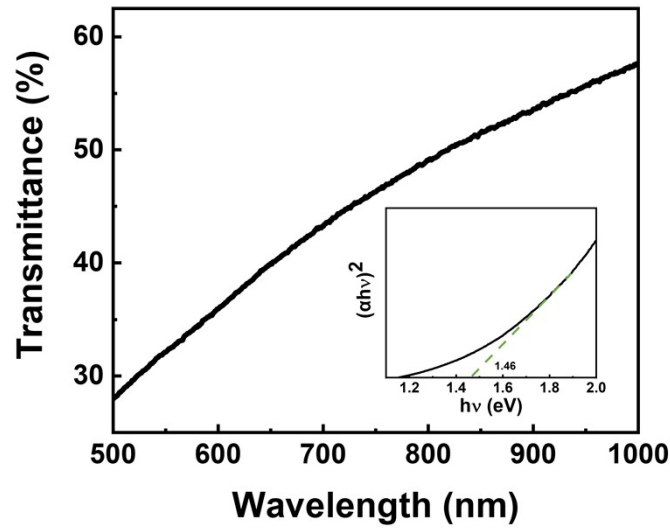

Figure. S2 Transmission spectral testing of WSeS films grown on SiO<sub>2</sub>.

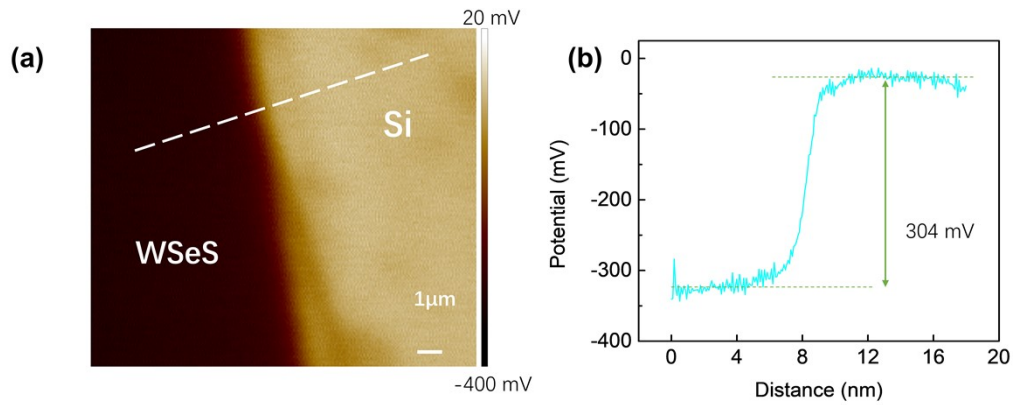

Figure. S3 (a) KPFM image of WSeS/Si. (b) Surface potential difference between WSeS and Si

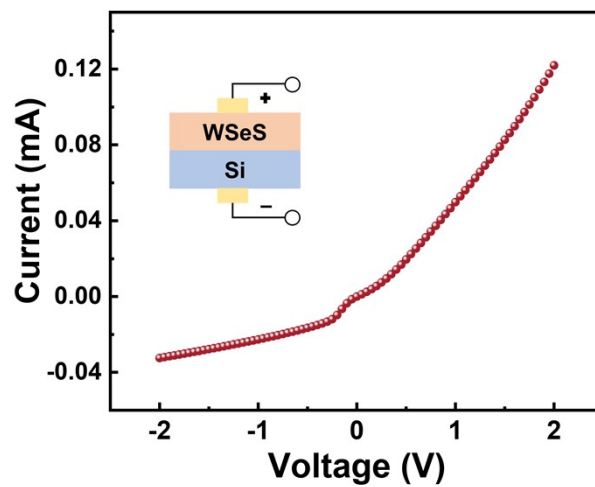

Figure. S4 I-V curve of the WSeS (8 nm)/ Si junction. The inset shows the schematic circuit for the junction measurement for the WSeS/Si junction.

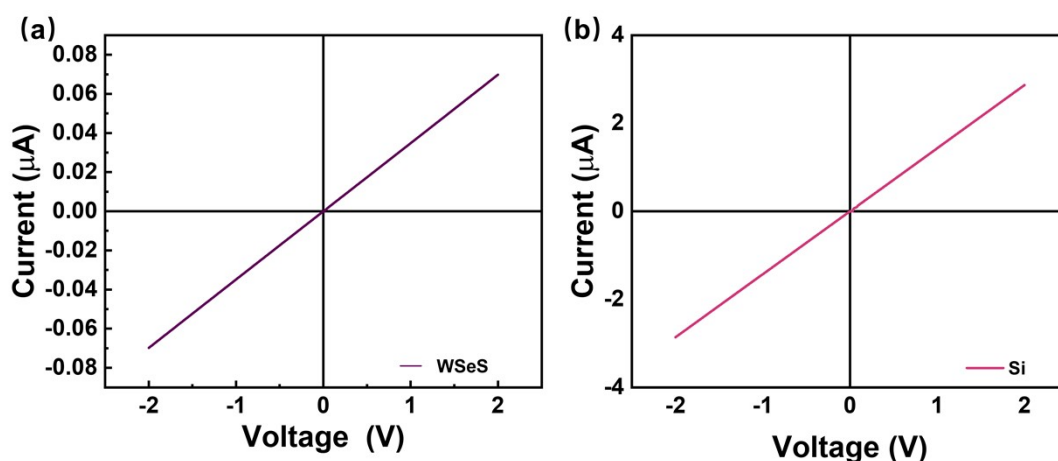

Figure. S5 I-V curves of (a) Au electrodes on WSeS thin film, and (b) Ag electrodes on Si.

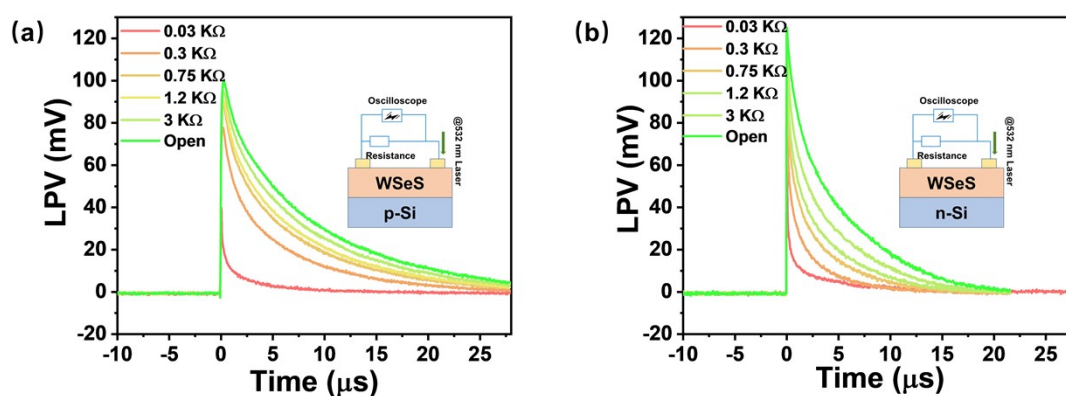

Figure S6. (a, b) LPV response over time for the WSeS/n-Si and WSeS/p-Si heterojunctions under the same 532 nm laser irradiation.

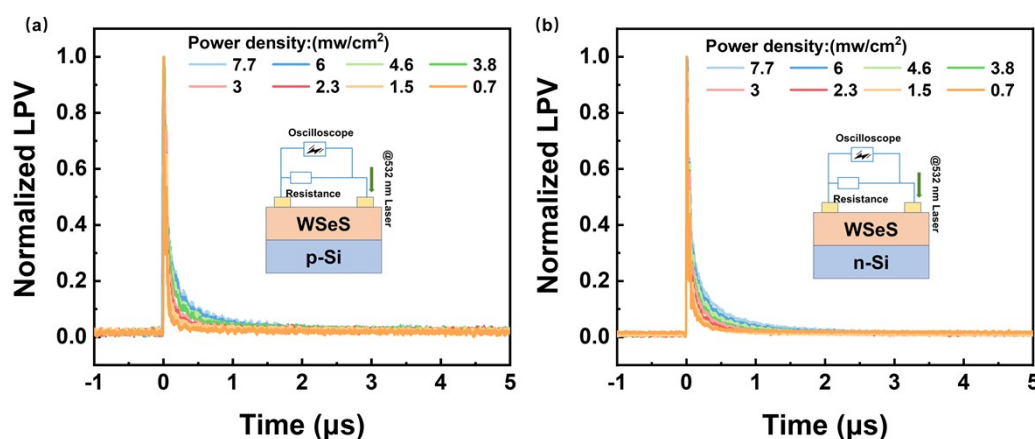

Figure. S7 LPV as a function of time for (a) the WSeS (8 nm)/n-Si and (b) WSeS (8 nm)/p-Si heterojunction under 532 nm laser irradiation with different optical power densities.

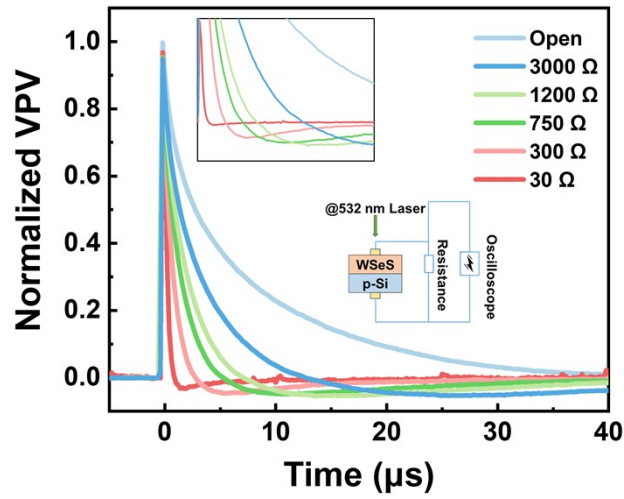

Figure. S8 VPV as a function of time for the WSeS (8 nm)/p-Si heterojunction under 532 nm laser irradiation.

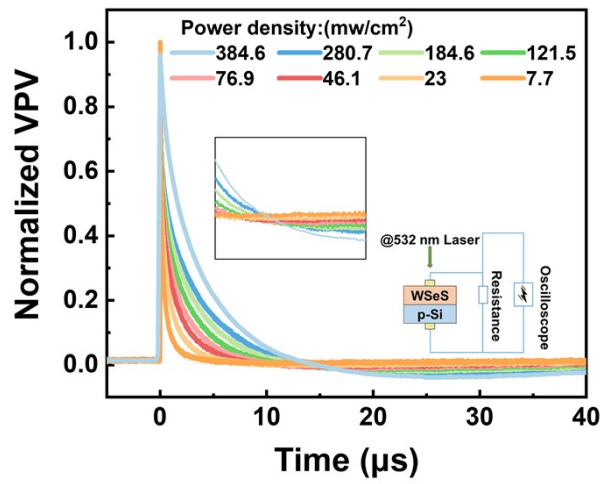

Figure. S9 VPV as a function of time for the WSeS (8 nm)/p-Si heterojunction under 532 nm laser irradiation with different optical power densities.
